# Supplementary material for: Characteristics and outcome of a first acute myocardial infarction in patients with ankylosing spondylitis
Source: Springer Nature journal article supplement (doi:10.1007/s10067-020-05354-3), 2020-08-26
Supplement: MOESM1 [file 18317040]

# **Characteristics and outcome of a first acute myocardial infarction in patients with ankylosing spondylitis**

Clinical Rheumatology

Anna Södergren<sup>1,5</sup>, Johan Askling<sup>2</sup>, Karin Bengtsson<sup>3</sup>, Helena Forsblad-d'Elia<sup>1</sup>, Tomas Jernberg<sup>4</sup>, Ulf Lindström<sup>3</sup>, Lotta Ljung<sup>1,2</sup>, Ängla Mantel<sup>2</sup>, Lennart TH Jacobsson<sup>3</sup>

<sup>1</sup>Department of Public Health and Clinical Medicine/Rheumatology, Umeå University, Umeå, Sweden, <sup>2</sup> Clinical Epidemiology Section, Department of Medicine Solna, Karolinska Institutet, Stockholm, Sweden, <sup>3</sup> Department of Rheumatology and Inflammation Research, Sahlgrenska Academy at University of Gothenburg, Gothenburg, Sweden, <sup>4</sup>. Dept of clinical sciences, Danderyd University Hospital, Karolinska Institutet, Stockholm, Sweden <sup>5</sup> Wallenberg Centre for Molecular Medicine (WCMM), Umeå University, Umeå, Sweden

**Corresponding author:** Anna Södergren, Dept. of Rheumatology, University Hospital, 901 85 Umeå, Sweden. Phone: +46 90 7851647; Email: [anna.sodergren@umu.se](mailto:anna.sodergren@umu.se)

**Supplementary table 1:** Coding according to International Classification of Disease (ICD) or Anatomical Therapeutic Chemicals (ATC) for included, excluded diagnosis or pharmaceutical treatment respectively

**Included diagnoses**

|                                   |             |       |
|-----------------------------------|-------------|-------|
|                                   | Time period | ICD10 |
| Ankylosing spondylitis (AS)       | 2001-2014   | M45   |
| Acute myocardial infarction (AMI) | 2006-2014   | I21   |

**Excluded diagnoses**

patients with diagnoses 1968-2005 were excluded

| Category                     | from ICD10 | to ICD10 | from ICD9 | to ICD9 | from ICD8 | to ICD8 |
|------------------------------|------------|----------|-----------|---------|-----------|---------|
| psoriatic arthritis          | L405       | L405     | 696A      | 696A    | 696,00    | 696,00  |
|                              | M070       | M071     | 713D      | 713D    |           |         |
|                              | M072       | M072     |           |         |           |         |
|                              | M073       | M073     |           |         |           |         |
| rheumatoid arthritis         | M05        | M059     | 714A      | 714C    | 712,10    | 712,10  |
|                              | M060       | M060     | 714W      | 714W    | 712,20    | 712,20  |
|                              | M062       | M063     | 719D      | 719D    | 712,38    | 712,39  |
|                              | M068       | M069     |           |         |           |         |
| reactive arthritis           | M123       | M123     |           |         |           |         |
|                              | M013       | M029     | 711B      | 711B    |           |         |
|                              | M036       | M036     | 711D      | 711W    |           |         |
| systemic lupus erythematosus | M320       | M321     | 710A      | 710A    | 734,10    | 734,10  |
|                              | M328       | M329     |           |         |           |         |
| juvenile arthritis           | M08        | M09      | 714D      | 714D    | 712,0     | 712,0   |
| myocardial infarction        | I21        | I22      | 410       | 410     | 410       | 410     |
| unstable angina pectoris     | I200       | I200     | 411B      | 411B    |           |         |

| AS-related co-morbidities before AMI:     | from ICD10 | to ICD10 | from ICD9 | to ICD9 | from ICD8 | to ICD8 |
|-------------------------------------------|------------|----------|-----------|---------|-----------|---------|
| Anterior uveitis                          | H20        | H20      | 364A      | 364B    | 364       | 364     |
|                                           |            | H221     |           |         |           |         |
| Inflammatory bowel disease                | K50        | K51      | 555       | 556     | 563,00    | 563,00  |
|                                           |            |          |           |         | 563,10    | 563,10  |
|                                           |            |          |           |         | 569,02    | 569,02  |
| <b>Cardiac co-morbidities before AMI:</b> |            |          |           |         |           |         |
| Ischemic heart disease*                   | I20        | I25      | 410       | 414     | 410       | 414     |
| Congestive Heart Failure                  | I30        | I52      | 420       | 429     | 420       | 429     |
| Cerebrovascular events*                   | I60        | I69      | 436       | 438     | 436       | 438     |
|                                           |            |          | 430       | 434     | 430       | 434     |
|                                           |            |          | 440       | 442     | 440       | 442     |

|                                            |                 |      |                     |      |        |        |
|--------------------------------------------|-----------------|------|---------------------|------|--------|--------|
|                                            | G45             | G45  | 433                 | 435  | 435    | 435    |
| Cardiac valve disease                      | I05             | I08  | 394                 | 397  | 394    | 396    |
|                                            | I34             | I38  | 424A                | 424D | 424,0  | 424,1  |
|                                            |                 |      | 424X                | 424X | 424,9  | 424,9  |
|                                            | Q230            | Q230 | 746D                | 746D | 746,73 | 746,73 |
| Atrial fibrillation                        | I48             | I48  | 427D                | 427D | 427,92 | 427,92 |
| <b>Other co-morbidities before ACS:</b>    |                 |      |                     |      |        |        |
| Pulmonary diseases                         | J40             | J47  | 490                 | 496  | 490    | 490    |
|                                            |                 |      |                     |      | 491,01 | 491,02 |
|                                            |                 |      |                     |      | 491,04 | 491,04 |
|                                            |                 |      |                     |      | 492    | 492    |
|                                            | J60             | J64  | 500                 | 505  | 491,01 | 491,02 |
|                                            | J66             | J67  | 515                 | 516  | 491,04 | 491,04 |
|                                            | J82             | J82  | 518A                | 518D | 492    | 493    |
|                                            | J84             | J84  |                     |      | 515    | 518    |
|                                            |                 |      |                     |      | 519,20 | 519,22 |
| Thromboembolic disease                     | I26             | I26  | 415B                | 415B | 450    | 453    |
|                                            |                 |      | 451                 | 453  |        |        |
|                                            | I80             | I82  | 451                 | 453  | 450    | 453    |
| Diabetes mellitus                          | O24             | O24  | 648A                | 648A |        |        |
|                                            | E10             | E14  | 250                 | 250  | 250    | 250    |
| Hypertension                               | I10             | I15  | 401                 | 405  | 400    | 404    |
| Infection, hospitalised                    | A00             | B99  | 001                 | 139  | 000    | 136    |
|                                            | G00             | G02  | 320                 | 322  | 320    | 320    |
|                                            | G042            | G042 | 382                 | 383  | 322    | 322    |
|                                            | G05             | G07  | 460                 | 466  | 381    | 383    |
|                                            | J00             | J22  | 526E                | 526F | 480    | 486    |
|                                            |                 |      | 480                 | 487  |        |        |
|                                            | N10             | N10  | 590                 | 590  | 590    | 590    |
| Malignancy                                 | C               | C    | 140                 | 239  | 140    | 239    |
| Renal disease                              | N00             | N19  | 580                 | 594  | 580    | 594    |
|                                            |                 |      |                     |      |        |        |
| <b>Causes of cardiovascular mortality</b>  |                 |      |                     |      |        |        |
| Ischemic heart disease                     | I20             | I25  |                     |      |        |        |
| Congestive Heart Failure                   | I30             | I52  |                     |      |        |        |
| Cerebrovascular events                     | I60             | I69  |                     |      |        |        |
| Peripheral artery disease                  | I71             | I74  |                     |      |        |        |
| Hypertension                               | E78             | E78  |                     |      |        |        |
| <b>Treatment related to AS before AMI:</b> | <b>ATC code</b> |      | <b>Generic name</b> |      |        |        |
| NSAID                                      | M01A            |      |                     |      |        |        |
| csDMARD                                    |                 |      |                     |      |        |        |
|                                            | A07EC01         |      | Sulfasalazine       |      |        |        |

|        |         |                       |
|--------|---------|-----------------------|
|        | L04AD01 | Cyclosporine          |
|        | L04AX01 | Azathioprine          |
|        | L01BA01 | Methotrexate          |
|        | L04AX03 | Methotrexate          |
|        | M01CB01 | Sodium aurothiomalate |
|        | M01CB03 | Auranofin             |
|        | P01BA01 | Cloroquine            |
|        | P01BA02 | Hydroxychloroquine    |
| bDMARD |         |                       |
|        | L01XC02 | Rituximab             |
|        | L04AA24 | Abatacept             |
|        | L04AB01 | Etanercept            |
|        | L04AB02 | Infliximab            |
|        | L04AB04 | Adalimumab            |
|        | L04AB05 | Certolizumabpegol     |
|        | L04AB06 | Golimumab             |
|        | L04AC03 | Anakinra              |
|        | L04AC07 | Tocilizumab           |
