# Supplementary material for: Characteristics and outcome of a first acute myocardial infarction in patients with ankylosing spondylitis
Source: Springer Nature journal article supplement (doi:10.1007/s10067-020-05354-3), 2020-08-26
Supplement: MOESM2 [file 18317040]

# **Characteristics and outcome of a first acute myocardial infarction in patients with ankylosing spondylitis**

Clinical Rheumatology

Anna Södergren<sup>1,5</sup>, Johan Askling<sup>2</sup>, Karin Bengtsson<sup>3</sup>, Helena Forsblad-d'Elia<sup>1</sup>, Tomas Jernberg<sup>4</sup>, Ulf Lindström<sup>3</sup>, Lotta Ljung<sup>1,2</sup>, Ängla Mantel<sup>2</sup>, Lennart TH Jacobsson<sup>3</sup>

<sup>1</sup>Department of Public Health and Clinical Medicine/Rheumatology, Umeå University, Umeå, Sweden, <sup>2</sup> Clinical Epidemiology Section, Department of Medicine Solna, Karolinska Institutet, Stockholm, Sweden, <sup>3</sup> Department of Rheumatology and Inflammation Research, Sahlgrenska Academy at University of Gothenburg, Gothenburg, Sweden, <sup>4</sup>. Dept of clinical sciences, Danderyd University Hospital, Karolinska Institutet, Stockholm, Sweden <sup>5</sup> Wallenberg Centre for Molecular Medicine (WCMM), Umeå University, Umeå, Sweden

**Corresponding author:** Anna Södergren, Dept. of Rheumatology, University Hospital, 901 85 Umeå, Sweden. Phone: +46 90 7851647; Email: [anna.sodergren@umu.se](mailto:anna.sodergren@umu.se)

**Supplementary table 2a:** Occurrence of prevalent co-morbidities in women with AS and a first AMI and matched general population comparators at admission for the first AMI. Data are presented as n (%) and the differences in frequencies in co-morbidities and disease manifestations were assessed using chi-square test.

|                            | AS (n=46) |      | Controls (n=173) |      | p-value |
|----------------------------|-----------|------|------------------|------|---------|
|                            | N         | %    | N                | %    |         |
| Anterior uveitis           | 4         | 8.7  | 0                | 0    | <.0001  |
| Inflammatory bowel disease | 2         | 4.4  | 3                | 1.7  | 0.3     |
| Ischemic heart disease     | 14        | 30.4 | 30               | 17.3 | 0.05    |
| Congestive Heart Failure   | 7         | 12.2 | 14               | 8.1  | 0.1     |
| Cerebrovascular events     | 11        | 23   | 24               | 14   | 0.1     |
| Cardiac valve disease      | 1         | 2.2  | 8                | 4.6  | 0.5     |
| Atrial fibrillation        | 7         | 15.2 | 23               | 13.3 | 0.7     |
| Arrhythmia                 | 2         | 4.4  | 5                | 2.9  | 0.6     |
| Pulmonary diseases         | 6         | 13.0 | 14               | 8.1  | 0.3     |
| Thrombotic disease         | 0         | 0    | 4                | 2.3  | 0.3     |
| Diabetes mellitus          | 7         | 15.2 | 33               | 19.1 | 0.5     |
| Hypertension               | 27        | 58.7 | 69               | 39.9 | 0.02    |
| Malignancy                 | 14        | 30.4 | 79               | 28.3 | 0.8     |
| Renal disease              | 7         | 15.2 | 12               | 6.9  | 0.08    |

**Supplementary table 2b:** Occurrence of prevalent co-morbidities in men with AS and a first AMI and matched general population comparators at admission for the first AMI. Data are presented as n (%) and the differences in frequencies in co-morbidities and disease manifestations were assessed using chi-square test.

|                            | AS (n=246) |      | Controls (n=1103) |      | p-value |
|----------------------------|------------|------|-------------------|------|---------|
|                            | N          | %    | N                 | %    |         |
| Anterior uveitis           | 61         | 24.8 | 8                 | 0.7  | <.0001  |
| Inflammatory bowel disease | 32         | 13.0 | 13                | 1.2  | <.0001  |
| Ischemic heart disease     | 70         | 28.5 | 199               | 18.0 | 0.0002  |
| Congestive Heart Failure   | 31         | 12.6 | 67                | 6.1  | 0.0004  |
| Cerebrovascular events     | 32         | 13.0 | 113               | 10.2 | 0.2     |
| Cardiac valve disease      | 21         | 8.5  | 26                | 2.4  | <.0001  |
| Atrial fibrillation        | 31         | 12.6 | 106               | 9.6  | 0.2     |
| Arrhythmia                 | 7          | 2.9  | 20                | 1.8  | 0.3     |
| Pulmonary diseases         | 19         | 7.7  | 56                | 5.1  | 0.1     |
| Thrombotic disease         | 13         | 5.3  | 21                | 1.9  | 0.002   |
| Diabetes mellitus          | 48         | 19.5 | 139               | 12.6 | 0.005   |
| Hypertension               | 130        | 52.9 | 333               | 30.2 | <.0001  |
| Malignancy                 | 46         | 18.7 | 169               | 15.3 | 0.2     |
| Renal disease              | 48         | 19.5 | 108               | 9.8  | <.0001  |
